# Supplementary material for: Standardized rice bran supplement ameliorates depressive behaviors via FKBP5 mediated glucocorticoid receptor signaling
Source: Research Square preprint supplement (doi:10.21203/rs.3.rs-6426888/v1), 2025-05-30
Supplement: Supplementary file 1 [file 3ee6bd6bf6190c1300a8cce8.docx]

Supporting information

NPJ science of food

**Standardized rice bran supplement ameliorates depressive-like behaviors in stress hormone-treated mice via GR/FKBP5 complex regulation**

Minji Kim1, 2, Haeun Lee1, 2, Changho Lee1, Suengmok Cho3, and Min Young Um1, 2*

1Food Functionality Research Division, Korea Food Research Institute, Wanju 55365, Republic of Korea

2Department of Food Biotechnology, University of Science & Technology, Daejeon 34113, Republic of Korea

3Department of Food Science and Technology/Institute of Food Science, Pukyong National University, Busan 48513, Republic of Korea

***Corresponding author**

Min Young Um, Ph.D., Prof.

Food Functionality Research Division, Korea Food Research Institute, Wanju 55365, Republic of Korea

Department of Food Biotechnology, University of Science & Technology, Daejeon 34113, Republic of Korea

Tel.: +82-63-219-9409; Fax: +82-63-219-9876

E-mail address: [myum@kfri.re.kr](mailto:myum@kfri.re.kr)

**Supplementary Figure 1**

**
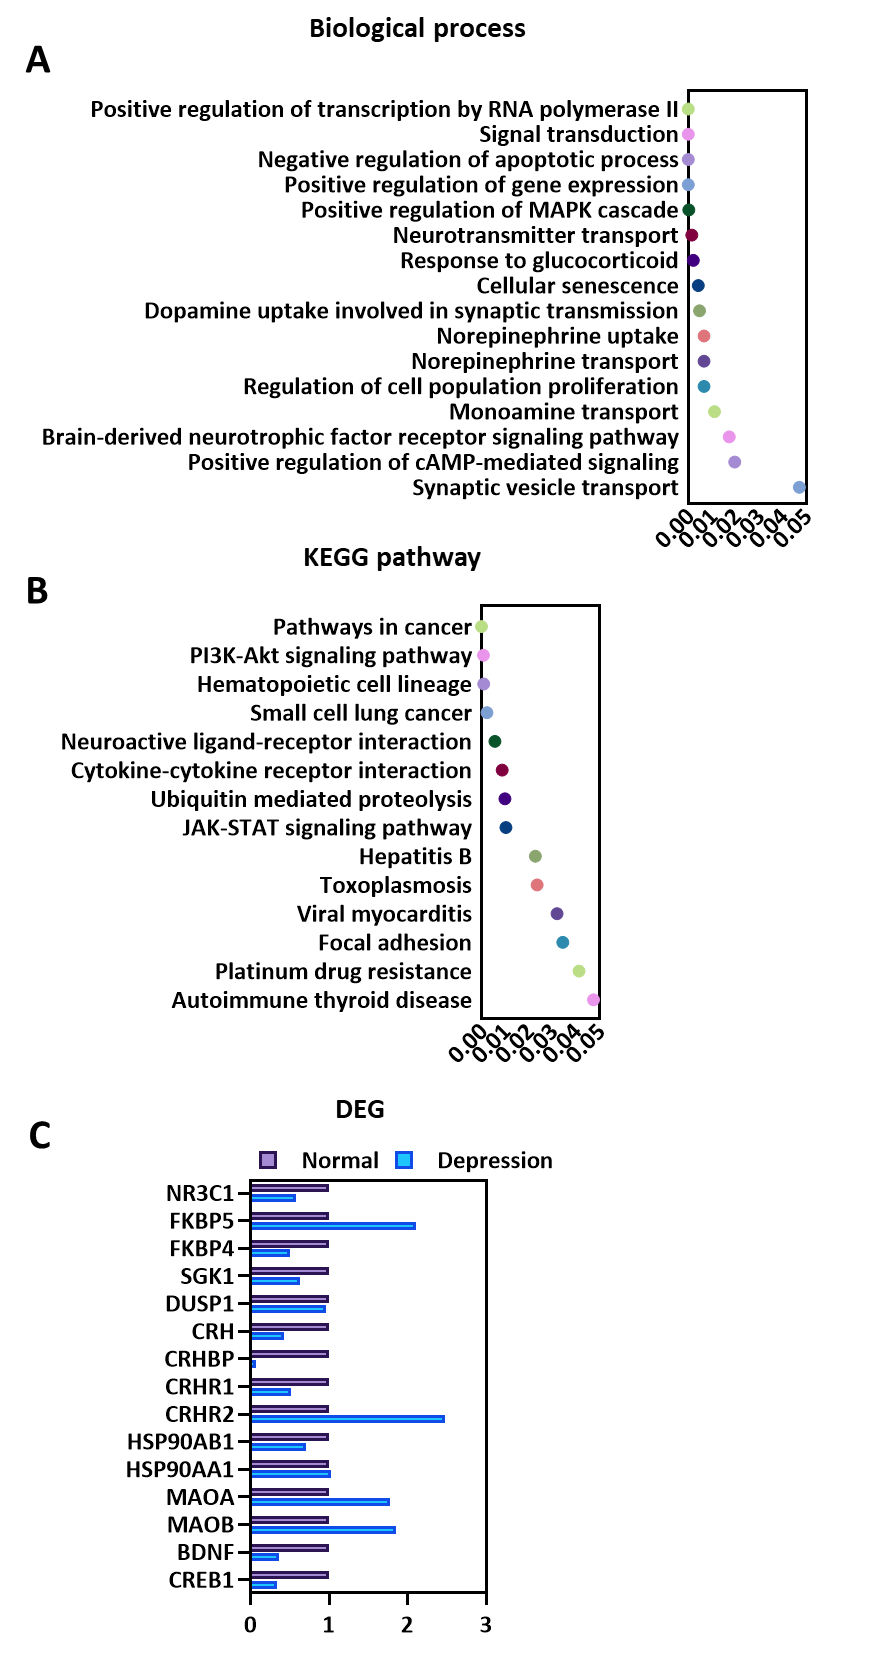
**

**Supplementary figure 1. Gene Ontology (GO) analysis of differential gene (DEG) expression in the human prefrontal cortex between control and depression groups (GSE12654).** Gene expression data from the human prefrontal cortex were obtained from the GSE12654 dataset (control, n=15; depression, n=11). (A) Biological process: GO analysis of DEG between the control and depression group revealed several significantly enriched biological processes. (B) KEGG pathway: GO analysis of the DEG identifies significant pathway altered in depression. (C) Specific genes related to critical signaling pathway, including the HPA axis, MAPK signaling, and the neurotransmitter system.
